# Supplementary material for: Genome analysis of the foxtail millet pathogen Sclerospora graminicola reveals the complex effector repertoire of graminicolous downy mildews
Source: PubMed Central journal article supplement (PMC5700566; doi:10.1186/s12864-017-4296-z), 2017-11-22
Supplement: 12864_2017_4296_MOESM9_ESM.pdf [file 12864_2017_4296_MOESM9_ESM.pdf]

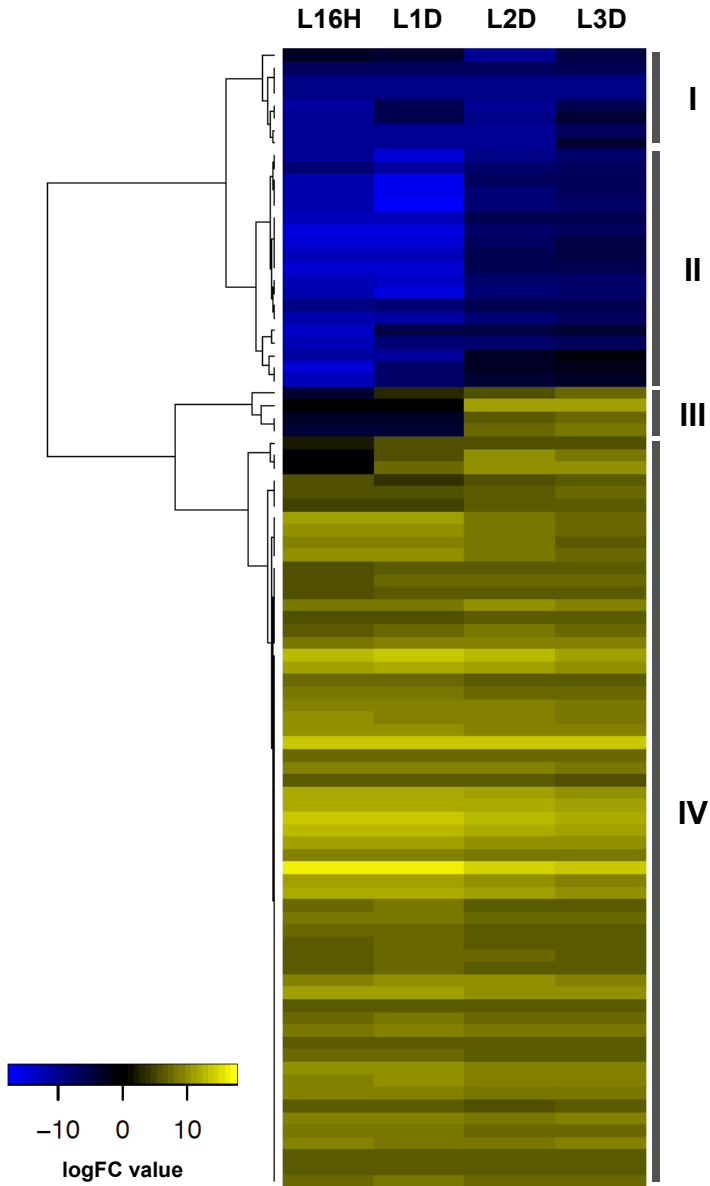

**Supplementary figure 2.** Heat map showing the expression patterns of DEGs encoding putative secreted proteins. Genes were clustered by logFC-Cosine method. Line plots of the expression patterns of each gene cluster. L16H: Sg-inoculated leaves 16 hours after inoculation; L1D, L2D, and L3D: Sg-inoculated leaves at one, two, and three days after inoculation, respectively.
