# Supplementary material for: Genome analysis of the foxtail millet pathogen Sclerospora graminicola reveals the complex effector repertoire of graminicolous downy mildews
Source: PubMed Central journal article supplement (PMC5700566; doi:10.1186/s12864-017-4296-z), 2017-11-22
Supplement: 12864_2017_4296_MOESM12_ESM.pdf [file 12864_2017_4296_MOESM12_ESM.pdf]

## A putative secreted protein genes

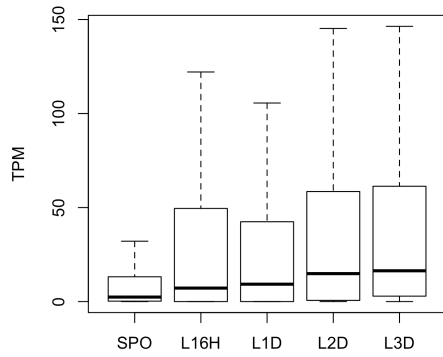

|         | SPO     | L16D    | L1D     | L2D     | L3D     |
|---------|---------|---------|---------|---------|---------|
| Min.    | 0.0     | 0.0     | 0.0     | 0.0     | 0.0     |
| 1st Qu. | 0.2     | 0.0     | 0.0     | 0.6     | 2.9     |
| Median  | 2.4     | 7.2     | 9.2     | 14.9    | 16.4    |
| Mean    | 101.7   | 144.2   | 146.0   | 134.2   | 123.5   |
| 3rd Qu. | 13.2    | 49.5    | 42.5    | 58.5    | 61.3    |
| Max.    | 27101.4 | 16331.4 | 22292.6 | 23446.9 | 19724.5 |

## B

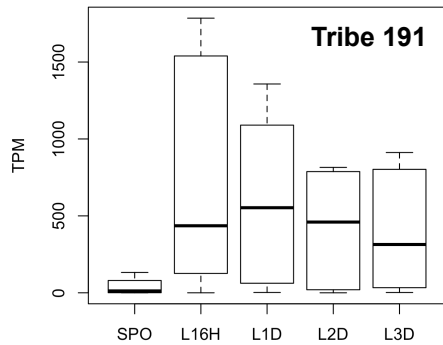

|         | SPO    | L16D    | L1D     | L2D     | L3D     |
|---------|--------|---------|---------|---------|---------|
| Min.    | 0.0    | 0.0     | 2.1     | 0.0     | 1.9     |
| 1st Qu. | 0.5    | 126.0   | 62.2    | 19.8    | 33.2    |
| Median  | 12.2   | 435.8   | 553.1   | 459.8   | 314.0   |
| Mean    | 371.6  | 2942.6  | 3414.0  | 3430.6  | 3122.8  |
| 3rd Qu. | 80.0   | 1539.5  | 1090.0  | 787.9   | 802.5   |
| Max.    | 3225.9 | 16331.4 | 22292.6 | 23446.9 | 19724.5 |

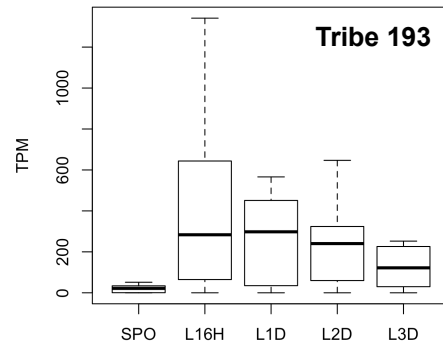

|         | SPO  | L16D   | L1D    | L2D   | L3D   |
|---------|------|--------|--------|-------|-------|
| Min.    | 0.0  | 0.0    | 0.0    | 0.0   | 0.0   |
| 1st Qu. | 0.4  | 64.7   | 34.8   | 59.8  | 29.9  |
| Median  | 21.5 | 283.5  | 297.9  | 240.3 | 122.0 |
| Mean    | 19.1 | 396.3  | 330.3  | 220.9 | 122.1 |
| 3rd Qu. | 34.0 | 643.7  | 451.1  | 323.9 | 226.1 |
| Max.    | 51.5 | 1341.4 | 1224.9 | 646.9 | 252.4 |

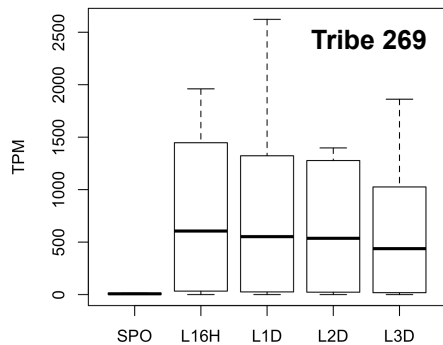

|         | SPO  | L16D   | L1D    | L2D    | L3D    |
|---------|------|--------|--------|--------|--------|
| Min.    | 0.0  | 0.0    | 0.0    | 0.0    | 0.0    |
| 1st Qu. | 1.8  | 45.8   | 33.7   | 34.2   | 25.1   |
| Median  | 7.2  | 605.5  | 552.1  | 536.2  | 437.6  |
| Mean    | 10.4 | 766.4  | 802.8  | 633.7  | 603.0  |
| 3rd Qu. | 12.8 | 1408.2 | 1294.9 | 1234.9 | 956.6  |
| Max.    | 37.7 | 1960.5 | 2622.8 | 1397.6 | 1861.9 |

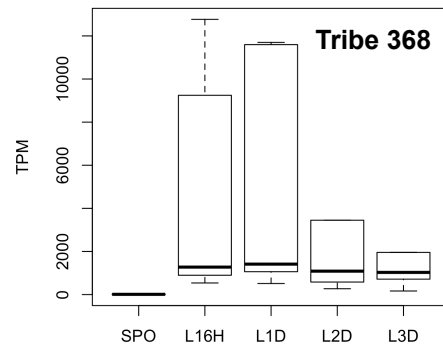

|         | SPO   | L16D    | L1D     | L2D     | L3D    |
|---------|-------|---------|---------|---------|--------|
| Min.    | 0.0   | 538.0   | 512.8   | 270.2   | 165.8  |
| 1st Qu. | 1.1   | 969.6   | 1099.2  | 646.8   | 753.8  |
| Median  | 10.7  | 1274.1  | 1412.4  | 1086.2  | 1027.9 |
| Mean    | 106.9 | 4332.8  | 4615.3  | 2763.7  | 2231.3 |
| 3rd Qu. | 21.5  | 7273.8  | 9099.2  | 2919.1  | 1764.4 |
| Max.    | 596.9 | 12768.6 | 11697.9 | 10229.1 | 8494.1 |

**Supplementary figure 4.** Distribution of gene expression values. Box plot of TPM of putative secreted protein genes (A) and genes clustered in *Sg*-specific Tribe of jacalin-like domain-containing proteins by TribeMCL (B).
