# Supplementary material for: Genome analysis of the foxtail millet pathogen Sclerospora graminicola reveals the complex effector repertoire of graminicolous downy mildews
Source: BMC Genomics. 2017 Nov 22;18:897. doi: 10.1186/s12864-017-4296-z (PMC5700566; doi:10.1186/s12864-017-4296-z)
Supplement: Supplementary file 8 — Summary of interproscan domain enrichment of DEGs encoding putative secreted proteins. Clusters I to IV correspond to the expression profiles given in Figure 3. Table S6.2 Summary of interproscan domain enrichment of putative secreted proteins clustered using logFC-Cosine method. Table S6.3 Summary of interproscan domain enrichment of putative secreted proteins clustered using MBCluster method. (XLSX 13 kb) [file 12864_2017_4296_MOESM8_ESM.xlsx]

## Sheet: Sheet1
Table S6.1. Summary of interproscan domain enrichment of DEGs encoding putative secreted proteins. Clusters I to IV correspond to the expression profiles given in Figure 3.
interproscan domain ID	putative-	cluster	cluster	cluster	cluster
	secreted	I	II	III	IV
total proteins	1220	17	13	14	37
RXLR-like	355	5	3	0	14
CAP domain	12	2	0	0	0
Formin, FH2 domain	1	1	0	0	0
GOLD domain	1	1	0	0	0
Protein of unknown function DUF3508	1	1	0	0	0
RUN domain	1	1	0	0	0
WASH complex, subunit CCDC53	1	1	0	0	0
FYVE zinc finger	1	1	0	0	0
Zinc finger, FYVE-related	1	1	0	0	0
Zinc finger, FYVE/PHD-type	1	1	0	0	0
CUB domain	2	2	0	0	0
Peptidase M8, leishmanolysin	1	1	0	0	0
Peptidase C26	1	0	1	0	0
Peptidase C26, gamma-glutamyl hydrolase	1	0	1	0	0
Cell wall protein YJL171C/Tos1	1	0	1	0	0
Chloroperoxidase	2	0	1	0	0
Class I glutamine amidotransferase-like	1	0	1	0	0
Domain of unknown function DUF2403, glycine-rich	1	0	1	0	0
Heat shock protein Hsp90 family	1	0	1	0	0
Heat shock protein Hsp90, N-terminal	1	0	1	0	0
Histidine kinase-like ATPase, C-terminal domain	1	0	1	0	0
Ribosomal protein S5 domain 2-type fold	1	0	1	0	0
Thaumatin	1	0	1	0	0
X8 domain	1	0	1	0	0
Jacalin-like lectin domain	45	0	0	6	2
Necrosis inducing protein	17	0	0	5	1
Pectinesterase, active site	2	0	0	1	0
Pectinesterase, catalytic	2	0	0	1	0
shaded area: enriched (p < 0.05, Fisher’s exact test)
Table S6.2. Summary of interproscan domain enrichment of putative secreted proteins clustered using logFC-Cosine method.
interproscan domain ID	putative-	cluster	cluster	cluster	cluster
	secreted	1	2	3	4
total proteins	1220	19	8	4	60
CUB domain	2	2	0	0	0
Formin, FH2 domain	1	1	0	0	0
FYVE zinc finger	1	1	0	0	0
GOLD domain	1	1	0	0	0
Histidine phosphatase superfamily	2	1	0	0	0
Histidine phosphatase superfamily, clade-2	2	1	0	0	0
Peptidase M8, leishmanolysin	1	1	0	0	0
Peptidase S1, PA clan	20	2	0	0	1
Peptidase S8, subtilisin-related	2	1	0	0	0
Peptidase S8/S53 domain	2	1	0	0	0
Protein of unknown function DUF3508	1	1	0	0	0
RUN domain	1	1	0	0	0
WASH complex, subunit CCDC53	1	1	0	0	0
Zinc finger, FYVE-related	1	1	0	0	0
Zinc finger, FYVE/PHD-type	1	1	0	0	0
Chloroperoxidase	2	0	1	0	0
Jacalin-like lectin domain	45	0	0	0	8
Necrosis inducing protein	17	0	0	0	6
shaded area: enriched (p < 0.05, Fisher’s exact test)
Table S6.3. Summary of interproscan domain enrichment of putative secreted proteins clustered using MBCluster method.
interproscan domain ID	putative-	cluster	cluster	cluster	cluster
	secreted	1	5	4	2
total proteins	1220	23	4	16	48
CAP domain	12	2	0	0	0
CUB domain	2	2	0	0	0
Formin, FH2 domain	1	1	0	0	0
FYVE zinc finger	1	1	0	0	0
GOLD domain	1	1	0	0	0
Peptidase M8, leishmanolysin	1	1	0	0	0
Protein of unknown function DUF3508	1	1	0	0	0
RUN domain	1	1	0	0	0
WASH complex, subunit CCDC53	1	1	0	0	0
Zinc finger, FYVE-related	1	1	0	0	0
Zinc finger, FYVE/PHD-type	1	1	0	0	0
Cell wall protein YJL171C/Tos1	1	0	0	1	0
Chloroperoxidase	2	0	0	1	0
Class I glutamine amidotransferase-like	1	0	0	1	0
Cysteine peptidase, asparagine active site	2	0	0	1	0
Domain of unknown function DUF2403, glycine-rich	1	0	0	1	0
Glycoside hydrolase 38/57, N-terminal domain	2	0	0	1	0
Glycoside hydrolase family 38, N-terminal domain	2	0	0	1	0
Glycoside hydrolase, families 57/38, central domain	2	0	0	1	0
Glycoside hydrolase, family 38, central domain	2	0	0	1	0
Glycoside hydrolase/deacetylase, beta/alpha-barrel	2	0	0	1	0
Glycosyl hydrolase family 38, C-terminal	2	0	0	1	0
Heat shock protein Hsp90 family	1	0	0	1	0
Heat shock protein Hsp90, N-terminal	1	0	0	1	0
Histidine kinase-like ATPase, C-terminal domain	1	0	0	1	0
Peptidase C26	1	0	0	1	0
Peptidase C26, gamma-glutamyl hydrolase	1	0	0	1	0
Ribosomal protein S5 domain 2-type fold	1	0	0	1	0
Thaumatin	1	0	0	1	0
X8 domain	1	0	0	1	0
Jacalin-like lectin domain	45	0	0	0	8
Necrosis inducing protein	17	0	0	0	6
shaded area: enriched (p < 0.05, Fisher’s exact test)
